# Supplementary material
Source: MDPI journal article supplement (https://www.mdpi.com/2073-4344/8/9/389)
Supplement: s1 [file s1]

Supplementary Materials

A Hybrid Reactor System Comprised of Non-Thermal Plasma and Mn/Natural Zeolite for the Removal of Acetaldehyde from Food Waste

Min Young Song 1,†, Hae Won Ryu 1,†, Sang-Chul Jung 2, JiHyeon Song 3, Byung-Joo Kim 4 and Young-Kwon Park 1,*

1 School of Environmental Engineering, University of Seoul, Seoul 02504, Korea;
mylove0807@uos.ac.kr (M.Y.S.); cookandcook94@gmail.com (H.W.R.)

2 Department of Environmental Engineering, Sunchon National University, Suncheon 57922, Korea; jsc@sunchon.ac.kr

3 Department of Civil and Environmental Engineering, Sejong University, Seoul, 05006, Korea; songjh@sejong.ac.kr

4 Research Laboratory for Multifunctional Carbon Materials, Korea Institute of Carbon Convergence Technology, Jeonju 54853, Korea; [kimbj2015@gmail.com](mailto:kimbj2015@gmail.com)

***** Correspondence: catalica@uos.ac.kr; Tel.: +82-2-2210-5623

† These authors contributed equally to this work.

Received: 3 August 2018; Accepted: 8 September 2018; Published: date


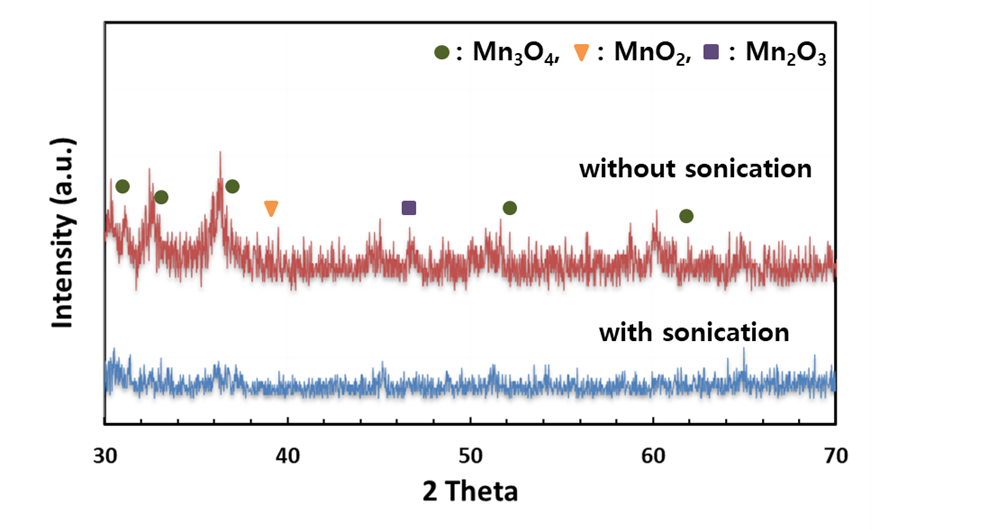


Figure S1. XRD of the treated Mn/NZ and untreated Mn/NZ of sonication


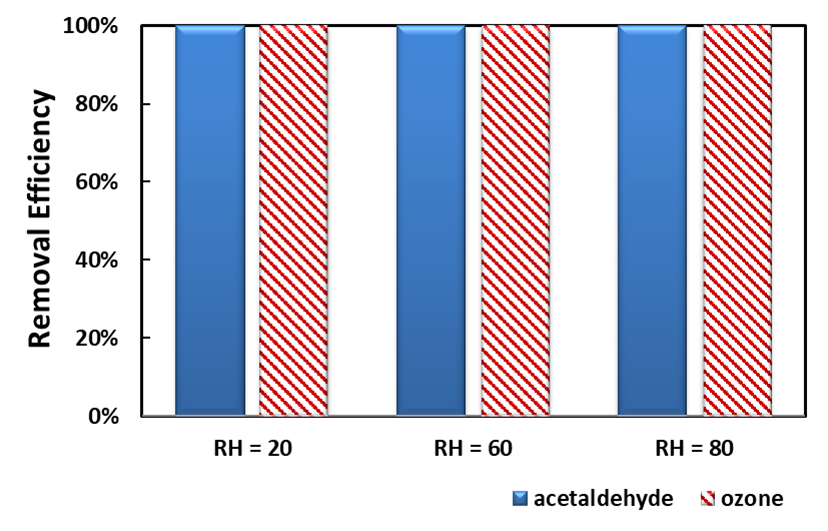


Figure S2. The effect of relative humidity on the catalytic activity of the 10 wt.% Mn/NZ.

for the acetaldehyde oxidation and the ozone decomposition (RH: Relative Humidity, %). The amount of catalysts**:** 5 g
